# Supplementary material for: Downsizing of animal communities triggers stronger functional than structural decay in seed-dispersal networks
Source: Nat Commun. 2020 Mar 27;11:1582. doi: 10.1038/s41467-020-15438-y (PMC7101352; doi:10.1038/s41467-020-15438-y)
Supplement: Supplementary file 5 — Supplementary Data 1 [file 41467_2020_15438_MOESM5_ESM.xlsx]

## Sheet: Sheet1
Scientific name	Family	Body mass (g)	Interaction network
Aburria_aburri	Cracidae	1405.08	CO1
Ampelion_rubrocristatus	Cotingidae	66.29	PE2
Andigena_hypoglauca	Ramphastidae	312.83	CO2, PE2
Andigena_nigrirostris	Ramphastidae	350	CO2
Anisognathus_igniventris	Thraupidae	34	PE2
Anisognathus_lacrymosus	Thraupidae	31	CO2, EC2
Anisognathus_somptuosus	Thraupidae	44	BO, CO1, CO2, EC2, PE1
Arremon_brunneinucha	Passerellidae	43.97	CO2
Arremon_flavirostris	Passerellidae	25.6	AR
Atlapetes_citrinellus	Passerellidae	28.1	AR
Atlapetes_latinuchus	Passerellidae	23.56	EC2
Atlapetes_schistaceus	Passerellidae	28.04	CO2
Aulacorhynchus_coeruleicinctis	Ramphastidae	208	BO, PE2
Aulacorhynchus_derbianus	Ramphastidae	209.71	PE1
Aulacorhynchus_haematopygus	Ramphastidae	194.39	CO1
Aulacorhynchus_prasinus	Ramphastidae	170.56	CO1, CO2, EC2
Basileuterus_tristriatus	Parulidae	12.03	EC2
Blythipicus_rubiginosus	Picidae	81.91	PE1
Buthraupis_montana	Thraupidae	87.08	CO2, PE2
Cacicus_chrysonotus	Icteridae	63.73	CO2, PE2
Cacicus_uropygialis	Icteridae	61.17	EC1
Cardellina_canadensis	Parulidae	10.04	CO2
Catharus_ustulatus	Turdidae	30.3	AR, CO1, EC1, EC2, PE1
Cephalopterus_ornatus	Cotingidae	380	PE1
Ceratopipra_erythrocephala	Pipridae	13.43	EC1
Chamaepetes_goudotii	Cracidae	727.67	CO1, CO2, EC1, EC2
Chiroxiphia_boliviana	Pipridae	17.13	BO, PE1
Chlorochrysa_calliparaea	Thraupidae	17	EC1, PE1
Chlorochrysa_nitidissima	Thraupidae	18.6	CO1
Chlorophanes_spiza	Thraupidae	19	EC1
Chlorophonia_cyanea	Fringillidae	14	CO1, PE1
Chloropipo_unicolor	Pipridae	15.5	PE1
Chlorornis_riefferii	Thraupidae	53	CO2, PE2
Chlorospingus_canigularis	Passerellidae	18	CO1, EC1
Chlorospingus_flavigularis	Passerellidae	25.6	EC1, PE1
Chlorospingus_flavopectus	Passerellidae	18.3	AR, BO, CO1, CO2, EC2, PE1
Chlorospingus_parvirostris	Passerellidae	24	PE1
Cnemoscopus_rubrirostris	Thraupidae	18	CO2
Coereba_flaveola	Thraupidae	10.01	EC1
Conirostrum_albifrons	Thraupidae	14.9	CO2
Cranioleuca_erythrops	Furnariidae	16.9	CO1
Creurgops_verticalis	Thraupidae	24	EC2
Cyanerpes_caeruleus	Thraupidae	12	PE1
Cyanocorax_chrysops	Corvidae	166	AR
Cyanocorax_yncas	Corvidae	78.5	EC2, PE1
Dacnis_cayana	Thraupidae	13	EC1, PE1
Dacnis_lineata	Thraupidae	11	EC1
Diglossa_albilatera	Thraupidae	9.84	EC2
Diglossa_brunneiventris	Thraupidae	12	PE2
Diglossa_caerulescens	Thraupidae	14.44	CO1, CO2, PE1
Diglossa_cyanea	Thraupidae	17.04	BO, CO1, CO2, EC2, PE1, PE2
Diglossa_glauca	Thraupidae	12	PE1
Diglossa_mystacalis	Thraupidae	16.2	PE2
Diglossa_sittoides	Thraupidae	9	PE2
Elaenia_albiceps	Tyrannidae	15.5	AR, EC2, PE1, PE2
Elaenia_obscura	Tyrannidae	23.9	AR
Elaenia_pallatangae	Tyrannidae	17.8	PE1, PE2
Elaenia_parvirostris	Tyrannidae	13.8	AR
Elaenia_spectabilis	Tyrannidae	27.3	AR
Empidonomus_varius	Tyrannidae	27.1	BO
Entomodestes_leucotis	Turdidae	61.7	PE1
Eubucco_bourcierii	Ramphastidae	37	CO1, EC1
Eubucco_versicolor	Ramphastidae	32.8	BO, PE1
Euphonia_chlorotica	Fringillidae	11	AR
Euphonia_cyanocephala	Fringillidae	14	AR
Euphonia_laniirostris	Fringillidae	15	EC1
Euphonia_mesochrysa	Fringillidae	13	PE1
Euphonia_xanthogaster	Fringillidae	13	CO1, CO2, EC1,PE1
Hemispingus_frontalis	Thraupidae	17	EC1, EC2
Hemispingus_superciliaris	Thraupidae	14	EC1
Heterospingus_xanthopygius	Thraupidae	38.8	EC1
Iridophanes_pulcherrimus	Thraupidae	15.3	EC1, PE1
Iridosornis_analis	Thraupidae	26	EC2, PE1
Iridosornis_jelskii	Thraupidae	20	PE2
Lepidocolaptes_lacrymiger	Dendrocolaptidae	30.6	EC2
Lepidothrix_coeruleocapilla	Pipridae	9.66	PE1
Lepidothrix_isidorei	Pipridae	7.8	EC1
Leptopogon_rufipectus	Pipromorphidae	13.4	CO2
Leptopogon_superciliaris	Pipromorphidae	11.7	EC1
Lipaugus_fuscocinereus	Cotingidae	138	CO2
Lipaugus_uropygialis	Cotingidae	116	BO
Lophotriccus_pileatus	Pipromorphidae	7.47	PE1
Machaeropterus_regulus	Pipridae	9.34	EC1
Masius_chrysopterus	Pipridae	11.52	CO1
Mecocerculus_poecilocercus	Tyrannidae	7.7	CO2
Mionectes_striaticollis	Pipromorphidae	15	BO, CO1, CO2, EC2, PE1, PE2
Momotus_aequatorialis	Momotidae	158	CO1
Myadestes_ralloides	Turdidae	29.1	CO1, EC1, EC2, PE1
Myiarchus_cephalotes	Tyrannidae	26.25	EC1
Myioborus_miniatus	Parulidae	9	BO, EC2
Ortalis_guttata	Cracidae	547.72	PE1
Pachyramphus_polychopterus	Tityridae	20.8	CO1, CO2
Pachyramphus_validus	Tityridae	43	AR
Pachyramphus_versicolor	Tityridae	15.5	CO2
Patagioenas_cayennensis	Columbidae	229	CO1
Patagioenas_fasciata	Columbidae	366.3	EC2, PE2
Patagioenas_plumbea	Columbidae	178.77	PE1
Patagioenas_subvinacea	Columbidae	162.48	CO2, EC1
Penelope_barbata	Cracidae	1179.66	EC2
Penelope_montagnii	Cracidae	706	BO, CO2, PE1, PE2
Penelope_obscura	Cracidae	1770	AR
Penelope_perspicax	Cracidae	1179.66	CO1
Pharomachrus_antisianus	Trogonidae	152.05	PE1
Pharomachrus_auriceps	Trogonidae	180	CO1, PE1
Pheucticus_aureoventris	Cardinalidae	49	AR, BO
Pheucticus_ludovicianus	Cardinalidae	42	CO1
Phyllomyias_nigrocapillus	Tyrannidae	9.5	CO2
Phyllomyias_plumbeiceps	Tyrannidae	9	CO1
Phyllomyias_sclateri	Tyrannidae	9.2	BO
Phylloscartes_ventralis	Pipromorphidae	8.3	AR
Pionus_menstruus	Psittacidae	251	EC1
Pipraeidea_melanonota	Thraupidae	21	AR, CO1, CO2, EC2
Pipreola_arcuata	Cotingidae	118	PE2
Pipreola_frontalis	Cotingidae	42.4	BO, EC1
Pipreola_intermedia	Cotingidae	51.18	PE1, PE2
Pipreola_riefferii	Cotingidae	49.3	CO2, EC2
Piranga_flava	Cardinalidae	37.7	AR, CO1
Piranga_leucoptera	Cardinalidae	16	CO1
Piranga_rubra	Cardinalidae	29.13	CO1, PE1
Poecilotriccus_ruficeps	Pipromorphidae	8.81	CO2
Pogonotriccus_ophthalmicus	Pipromorphidae	9.2	CO1
Poospiza_erythrophrys	Thraupidae	14	AR
Psarocolius_angustifrons	Icteridae	271.5	EC1, PE1
Psarocolius_atrovirens	Icteridae	152	PE1
Pseudopipra_pipra	Pipridae	11.11	EC1
Psittacara_leucophthalmus	Psittacidae	158	PE1
Psittacara_mitratus	Psittacidae	249	BO
Pyroderus_scutatus	Cotingidae	357	CO1
Pyrrhura_albipectus	Psittacidae	103.82	EC1
Pyrrhura_molinae	Psittacidae	77.09	BO
Ramphocelus_carbo	Thraupidae	25.92	PE1
Rupicola_peruvianus	Cotingidae	242.5	BO, CO1, EC1, EC2, PE1
Saltator_grossus	Thraupidae	44.2	EC1
Saltator_maximus	Thraupidae	47.62	EC1, PE1
Setophaga_fusca	Parulidae	9.74	CO1, CO2
Setophaga_pitiayumi	Parulidae	6.82	AR, EC1
Spinus_magellanicus	Fringillidae	13.6	AR
Syndactyla_rufosuperciliata	Furnariidae	25.6	AR
Tachyphonus_cristatus	Thraupidae	18.8	EC1
Tachyphonus_rufus	Thraupidae	34.4	EC2
Tangara_argyrofenges	Thraupidae	19	BO
Tangara_arthus	Thraupidae	22	CO1, EC1, PE1
Tangara_chilensis	Thraupidae	19.77	EC1, PE1
Tangara_chrysotis	Thraupidae	24	EC1, PE1
Tangara_cyanicollis	Thraupidae	17	EC1, PE1
Tangara_gyrola	Thraupidae	21	EC1, PE1
Tangara_heinei	Thraupidae	20.2	CO1, CO2
Tangara_labradorides	Thraupidae	15	CO1, CO2, EC2
Tangara_nigrocincta	Thraupidae	17	EC1
Tangara_nigroviridis	Thraupidae	17	CO1, CO2, EC1, EC2, PE1, PE2
Tangara_parzudakii	Thraupidae	28	EC2
Tangara_punctata	Thraupidae	15	EC1, PE1
Tangara_ruficervix	Thraupidae	19	PE1
Tangara_schrankii	Thraupidae	19	EC1
Tangara_vassorii	Thraupidae	18	BO, CO2, EC2, PE1, PE2
Tangara_viridicollis	Thraupidae	21	EC2
Tangara_vitriolina	Thraupidae	23	CO1
Tangara_xanthocephala	Thraupidae	19	BO, CO1, CO2, EC1, EC2, PE1
Tangara_xanthogastra	Thraupidae	15	EC1
Thraupis_bonariensis	Thraupidae	36	PE1, PE2
Thraupis_cyanocephala	Thraupidae	36	BO, CO2, EC2, PE1, PE2
Thraupis_episcopus	Thraupidae	35	EC1, EC2, PE1
Thraupis_palmarum	Thraupidae	39	EC1, PE1
Thraupis_sayaca	Thraupidae	32.49	AR
Trichothraupis_melanops	Thraupidae	22.58	PE1
Trogon_collaris	Trogonidae	65.43	CO1
Trogon_personatus	Trogonidae	63.39	CO1, CO2, PE1, PE2
Turdus_albicollis	Turdidae	54	BO,EC1
Turdus_chiguanco	Turdidae	93.29	PE1
Turdus_fulviventris	Turdidae	70	EC1, EC2
Turdus_fuscater	Turdidae	143	EC2, PE2
Turdus_ignobilis	Turdidae	63.78	CO1
Turdus_leucops	Turdidae	62.4	EC1
Turdus_nigriceps	Turdidae	52.7	AR, EC1
Turdus_rufiventris	Turdidae	69.44	AR
Turdus_serranus	Turdidae	84.9	CO1, CO2, PE2
Vireo_leucophrys	Vireonidae	12.3	CO1, EC2
Zimmerius_bolivianus	Tyrannidae	11	PE1
Zimmerius_viridiflavus	Tyrannidae	9.6	CO1
